# Supplementary material for: The Childbirth Fear Questionnaire and the Wijma Delivery Expectancy Questionnaire as Screening Tools for Specific Phobia, Fear of Childbirth
Source: MDPI journal article supplement (doi:10.3390/ijerph19084647), 2022-04-12
Supplement: s1 [file s1]

Supplementary material

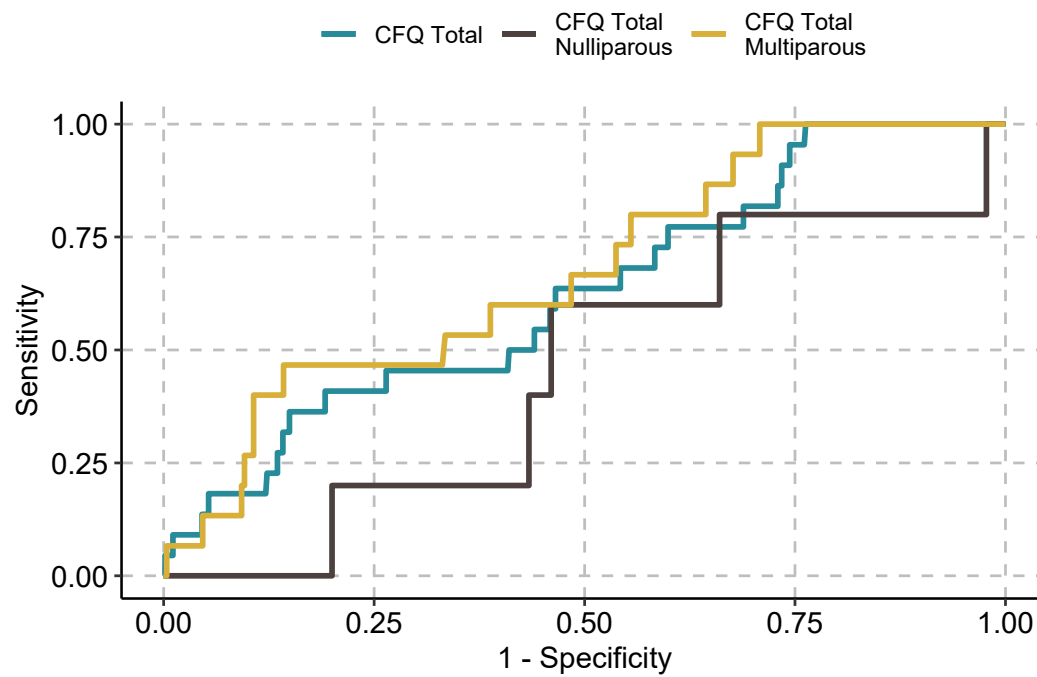

**Figure S1.** Receiver operating characteristic (ROC) curves for the Childbrith Fear Questionnaire (CFQ) across parity (full diagnostic criteria ONLY).

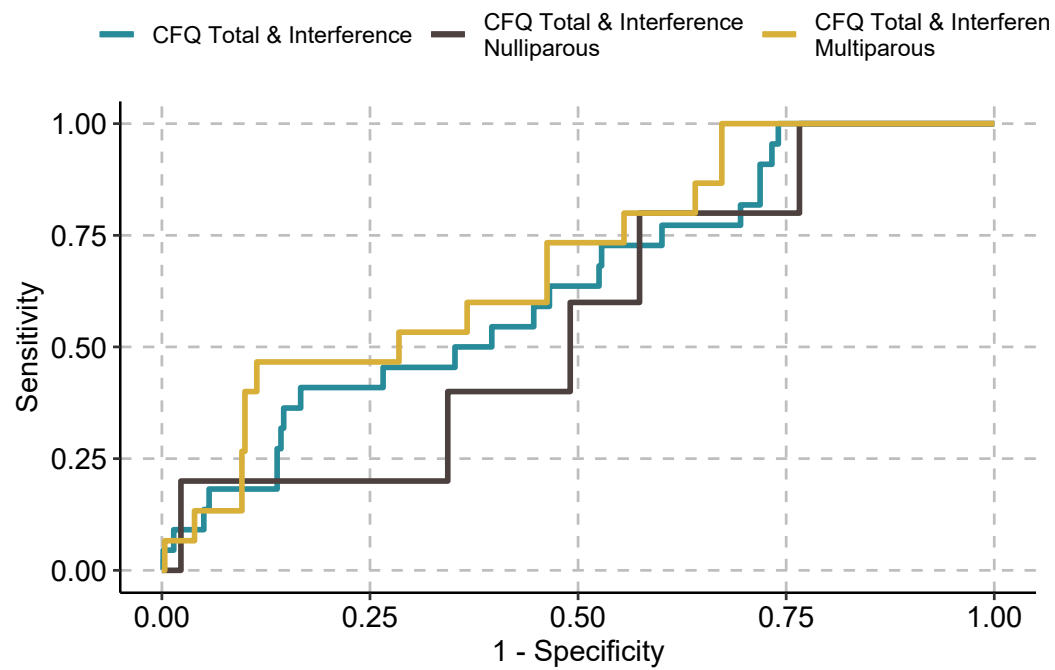

**Figure S2.** ROC curves for the CFQ (Total and Interference Subscale scores) across parity (full diagnostic criteria ONLY).

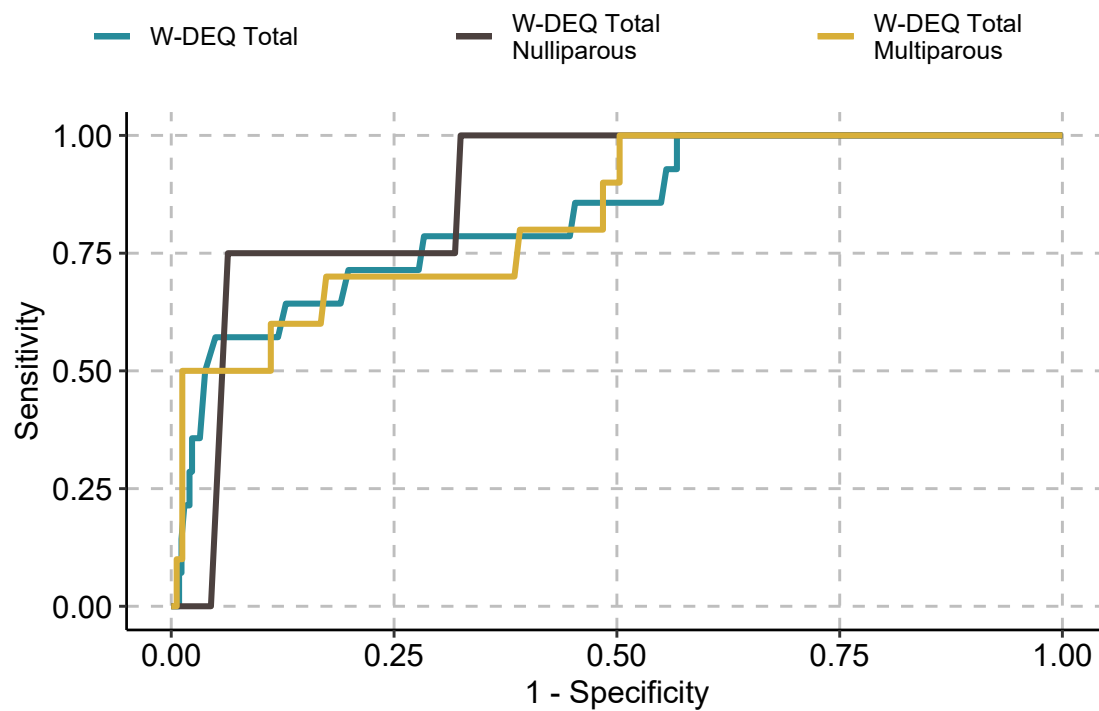

**Figure S3.** ROC curves for the Wijma Delivery Expectations Questionnaire (W-DEQ) across parity (full diagnostic criteria ONLY).

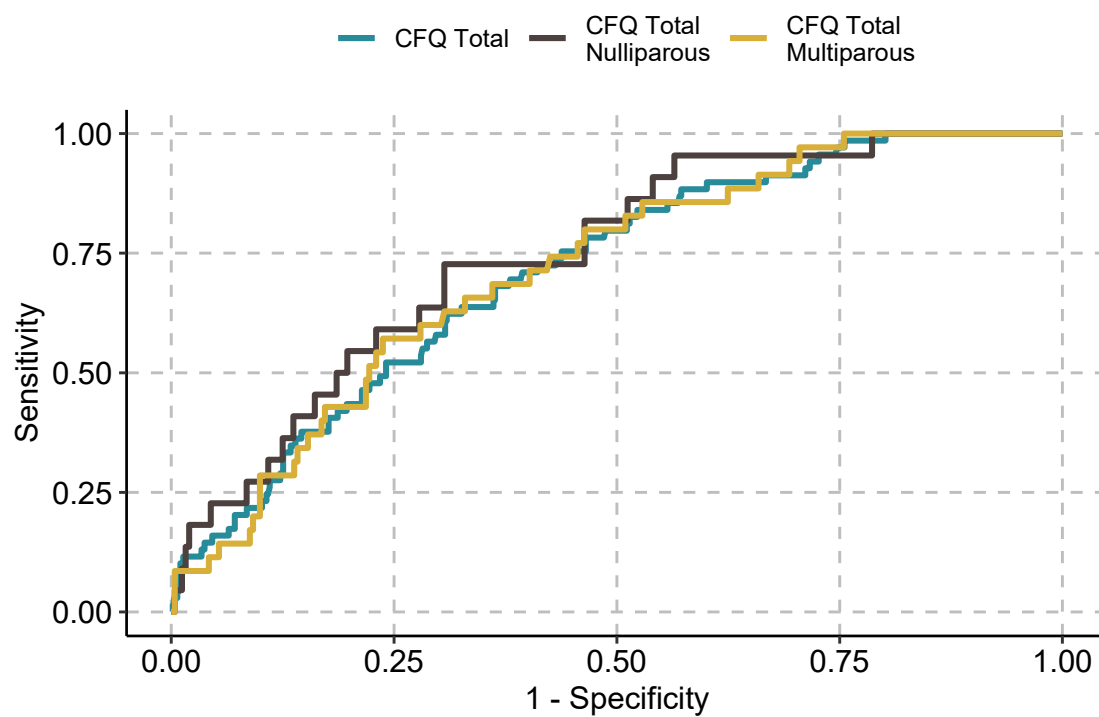

**Figure S4.** ROC curves for the CFQ across parity (subclinical and full diagnostic criteria combined).

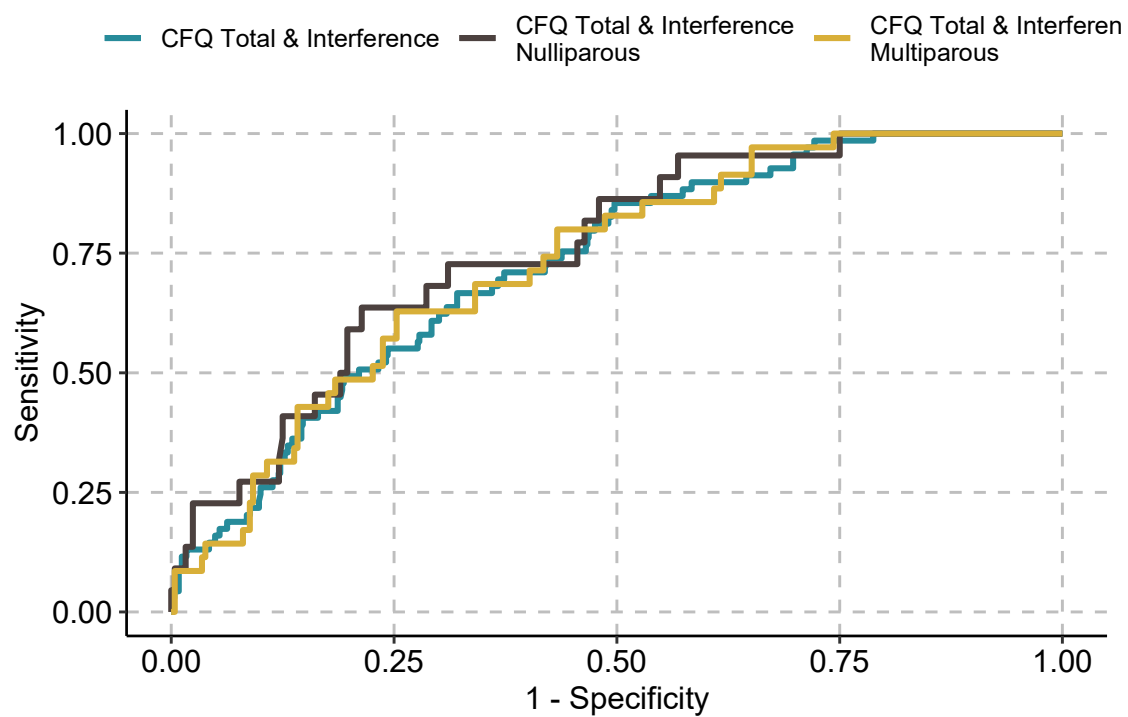

**Figure S5.** ROC curves for the CFQ (Total and Interference Subscale scores) across parity (subclinical and full diagnostic criteria combined).

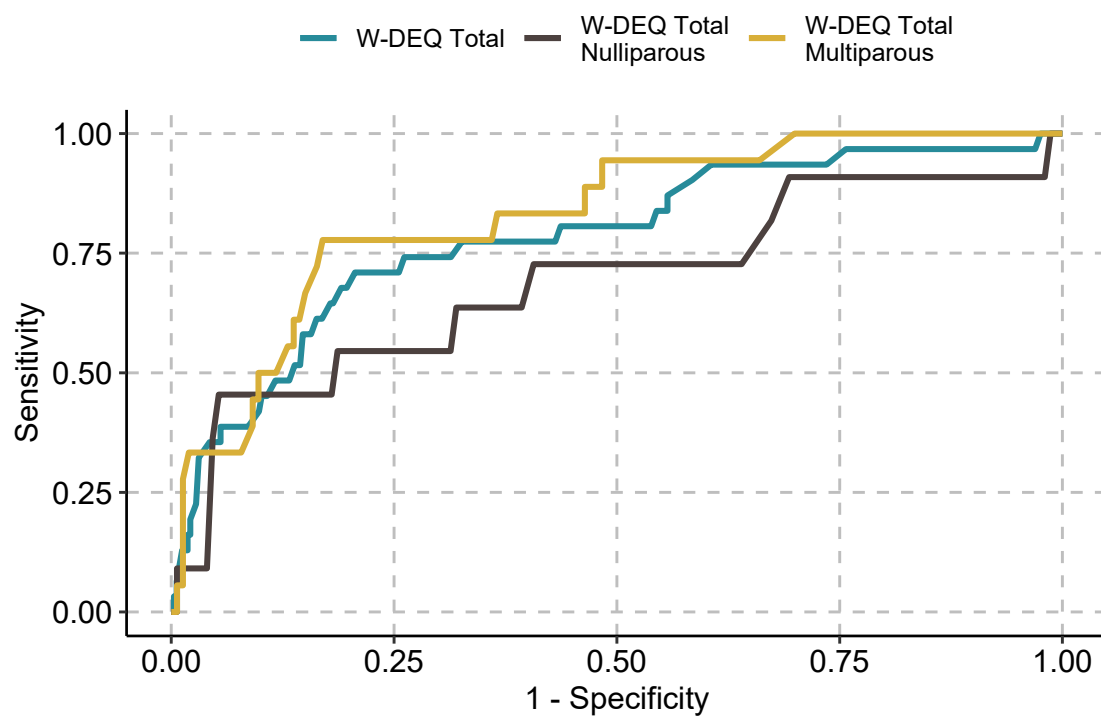

**Figure S6.** ROC curves for the W-DEQ across parity (subclinical and full diagnostic criteria combined).

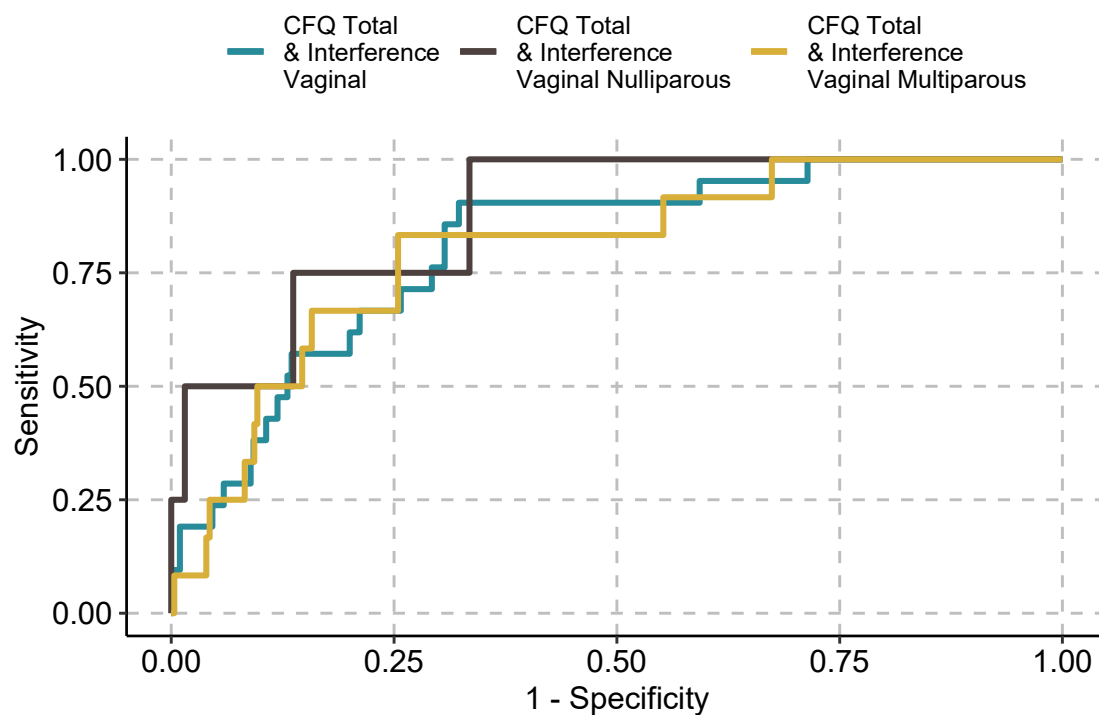

**Figure S7.** ROC curves for the CFQ across parity, separately for fear of vaginal birth (subclinical and full diagnostic criteria combined)

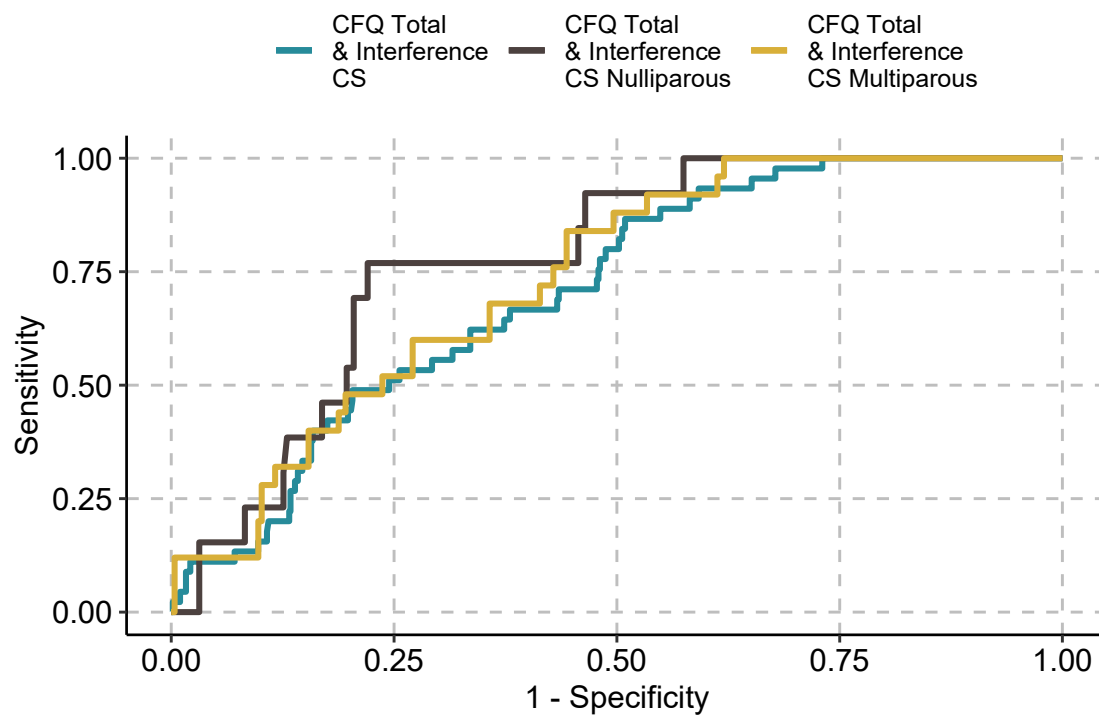

**Figure S8.** ROC curves for the CFQ across parity (Total and Interference Subscale scores), separately for fear of cesarean birth (CS; subclinical and full diagnostic criteria combined).



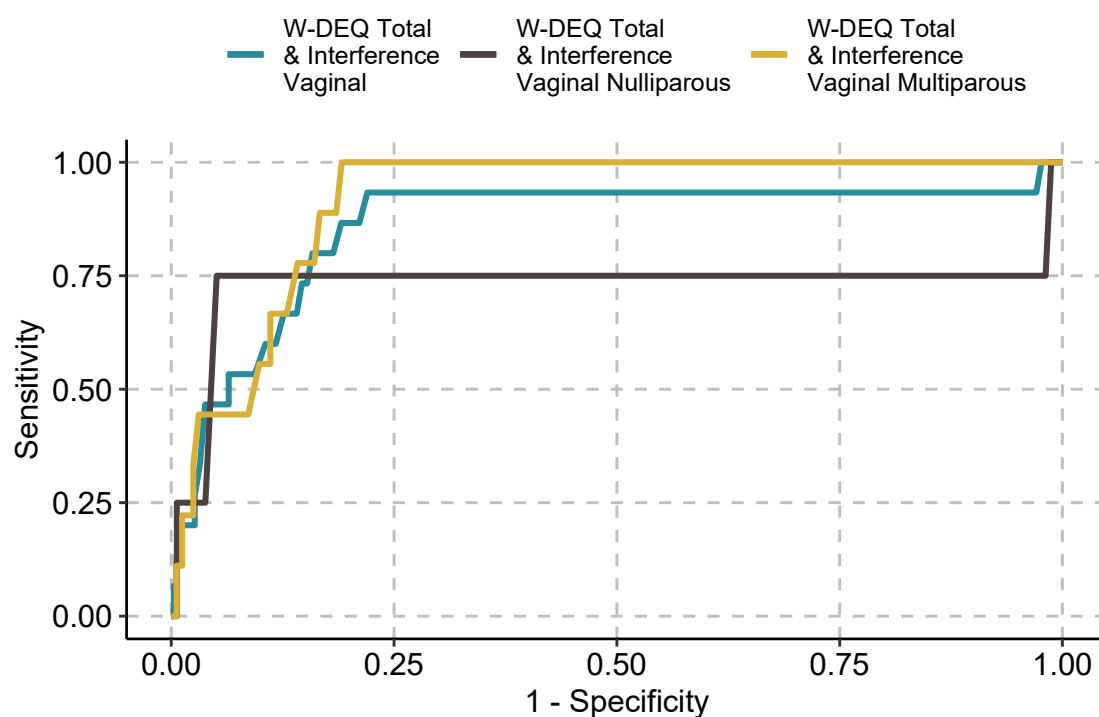

**Figure S9.** ROC curves for the W-DEQ across parity, separately for fear of vaginal birth (subclinical and full diagnostic criteria combined)
